# Supplementary figures and images for: Growth and characterization of gold catalyzed SiGe nanowires and alternative metal-catalyzed Si nanowires
Source: Springer Nature journal article supplement (doi:10.1186/1556-276x-6-187), 2011-03-01

325°C

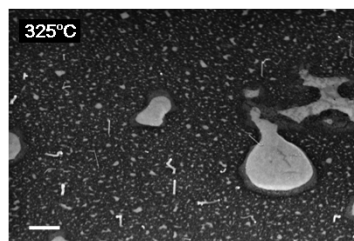

350°C

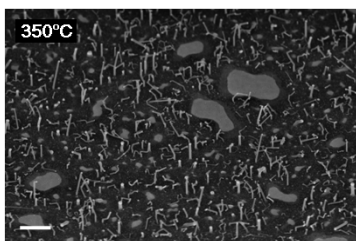

375°C

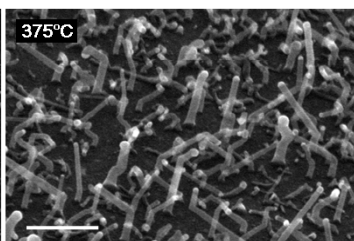

400°C

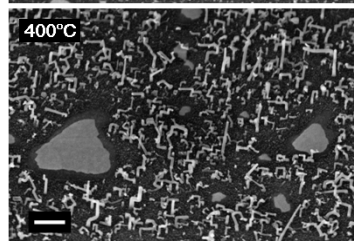

425°C

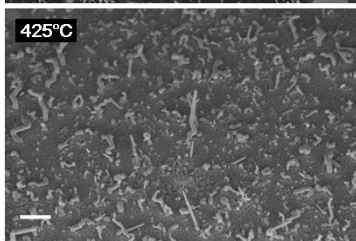

450°C

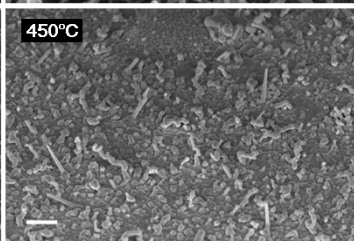

Supplement: 11671_2010_126_MOESM1_ESM.pdf [file 11671_2010_126_MOESM1_ESM.pdf]

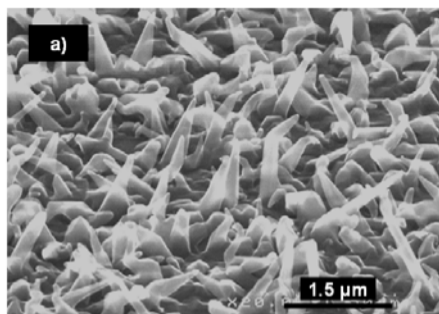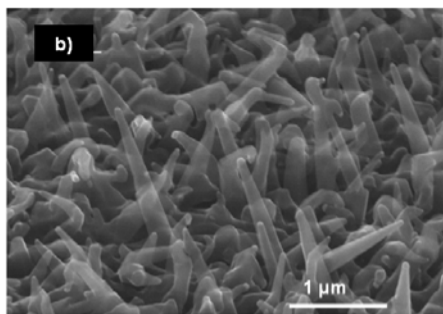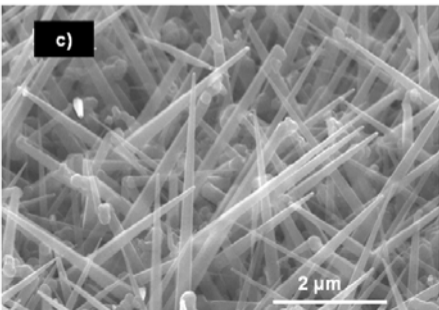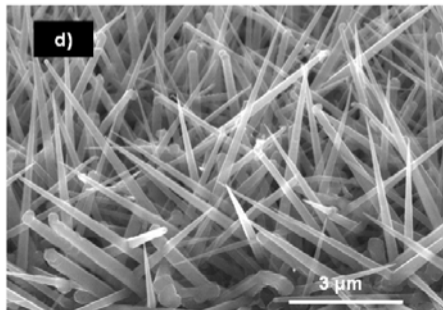

Supplement: 11671_2010_126_MOESM5_ESM.pdf [file 11671_2010_126_MOESM5_ESM.pdf]
